# Supplementary material
Source: publisher figshare collection journal article supplement (https://gsapubs.figshare.com/ndownloader/files/39625441)
Supplement: Supplementary file 1 [file 39625441]

## Sheet: Sheet1
Supplementary Material DR-Table 5: Whole rock geochemical data of eclogites.
No.	SA52A	SA53A	SA55A	SA56A	KO30A	KO31A	SA45A1	SA45A2	SA45A3	SA45A4	SA45A5
SO2	48.45	48.32	48.1	55.59	47.15	48.1	48.72	48.16	49.33	49.74	49.65
Al2O3	14.49	14.36	15.21	14.86	16.1	15.66	14.87	15.03	14.77	15	14.88
Fe2O3	13.47	13.04	12.46	8.12	11.62	10.46	11.98	12.58	11.78	11.74	12.06
MgO	8.98	7.73	7.96	5.38	7.91	9.97	8.06	8.02	8.1	7.78	7.62
CaO	9.86	10.44	11.67	11.07	11.97	10.81	12.21	12.1	12.33	12.07	12.16
Na2O	2.34	3.07	2.19	2.86	2.22	1.93	2.68	2.64	2.79	2.45	2.6
K2O	0.074	0.512	0.05	0.227	0.251	0.221	0.04	0.04	0.04	0.03	0.03
MnO	0.237	0.23	0.2	0.514	0.224	0.22	0.212	0.26	0.214	0.223	0.241
TiO2	1.73	1.8	1.7	0.851	1.4	1.56	1.477	1.51	1.428	1.452	1.417
P2O5	0.139	0.133	0.132	0.165	0.109	0.028	0.125	0.13	0.123	0.125	0.129
LOI	0.12	0.27	0.12	0.26	0.94	0.97	-0.692209	-0.556771	-0.690348	-0.55988	-0.493869
Total	99.89	99.905	99.792	99.897	99.894	99.929	99.6818	99.9132	100.215	100.05	100.293
FeO	8.35	9.01	5.88	6.37	9.01	7.09	-	-	-	-	-
Li	16.3	17.9	6.74	22.6	167	91.4	27.7	27.2	28.8	27.8	25.1
Be	0.732	1.14	0.558	3.69	0.567	0.504	43.3	42.8	42.4	42.1	40.5
Sc	54.1	43.3	50.9	27.7	50.1	47.3	314	295	318	307	307
V	333	309	346	235	282	224	261	256	267	247	248
Cr	564	504	501	479	463	426	-	-	-	-	-
Co	67.3	54.4	64.6	62	63.8	62.5	45.9	48.8	44	41.9	45
Ni	88.5	69.4	82.9	112	88.6	130	87.3	84.1	88.1	67.3	76.3
Cu	128	177	40.2	115	136	209	53.6	49.9	38.8	41.5	40.7
Zn	201	165	91.2	143	150	108	62.3	63.6	61.1	59.5	57.6
Ga	17.6	16.4	18.7	18.1	20.7	13.5	17.4	17.5	17.8	16.8	18
Rb	0.874	13.3	1.07	3.78	8.21	4.17	0.576	0.82	0.645	0.645	0.56
Sr	36.7	45.3	72.5	245	192	213	99.4	117	113	117	155
Y	47.6	47.9	45.7	26.7	40.8	36.6	34.1	34.7	32.8	32.2	33.5
Mo	11.1	10.6	7.31	25.9	5.53	4.66	-	-	-	-	-
Cd	0.34	0.317	0.172	0.315	0.306	0.155	-	-	-	-	-
In	0.066	0.068	0.075	0.073	0.065	0.051	-	-	-	-	-
Sb	0.064	0.092	0.564	0.065	0.098	0.177	-	-	-	-	-
Cs	0.303	0.372	0.076	0.193	0.524	1.07	0.0706	0.0916	0.0747	0.0801	0.0706
Ba	2.42	32.5	3.46	41.6	23.3	27.1	3.91	5.68	3.53	6.04	4.27
La	6.63	0.405	3.23	17.2	5.34	7	3.14	3.88	3.58	3.63	3.87
Ce	19.3	1.25	7.62	32.5	11.6	23.6	9.54	11.8	11.2	11.1	11.9
Pr	3.86	0.275	1.74	4	2.48	3.53	1.65	2.04	1.92	1.93	2.05
Nd	15.9	2.5	10.7	21.8	15.4	14.2	8.96	11.1	10.4	10.5	11.2
Sm	5.45	1.75	3.38	4.75	4.17	4.45	3.09	3.79	3.54	3.66	3.98
Eu	1.79	0.739	0.749	0.99	0.942	1.2	1.15	1.41	1.31	1.36	1.55
Gd	5.97	3.83	2.94	4.49	3.63	4.81	4.38	5.2	4.85	4.98	5.55
Tb	1.1	0.758	0.953	0.835	0.661	0.899	0.815	0.905	0.862	0.882	0.969
Dy	6.24	7.04	5.76	4.32	5.68	6.2	5.48	5.75	5.52	5.54	5.92
Ho	1.49	1.72	1.32	0.964	1.22	1.48	1.23	1.26	1.19	1.18	1.23
Er	6.33	6.3	5.2	3.49	4.29	4.32	3.57	3.6	3.39	3.34	3.41
Tm	0.639	0.643	0.747	0.339	0.687	0.506	0.545	0.551	0.522	0.506	0.512
Yb	4.92	4.18	5.45	2.51	3.8	3.28	3.42	3.46	3.28	3.16	3.22
Lu	0.717	0.593	0.758	0.37	0.459	0.513	0.521	0.53	0.502	0.479	0.492
W	0.492	0.646	0.417	2.22	1.4	1.37	-	-	-	-	-
Re	0.002	0.002	0.002	0.008	<0.002	0.002	-	-	-	-	-
Tl	0.02	0.083	0.006	0.046	0.112	0.043	-	-	-	-	-
Pb	5.44	0.982	1.2	27.5	4.86	2.42	3.9	13.1	4.34	4.06	5.43
Bi	0.06	0.023	0.013	0.949	0.16	0.035	-	-	-	-	-
Th	0.289	0.019	0.135	2.94	0.227	0.411	0.147	0.184	0.172	0.183	0.184
U	0.067	0.026	0.08	1.79	0.204	0.411	0.0818	0.0941	0.0918	0.088	0.118
Nb	2.3	2.67	2.22	5.4	2.59	5.78	2.6	1.48	2.97	2.54	2.56
Ta	0.225	0.253	0.219	0.427	0.231	0.448	0.183	0.111	0.17	0.169	0.173
Zr	42.3	48.3	33	22.8	28.5	76.5	53.5	10.5	61.8	51.4	66.9
Hf	1.53	1.49	1.09	0.838	1.09	1.96	1.64	0.541	1.81	1.58	1.94
Ti	10395.2	10830.5	10225	5120.33	8481.71	9450.57	8821.61	9010.09	8484.07	8651.95	8428.57
P	608.3	582.832	578.235	723.047	480.946	123.54	543.741	564.95	532.226	542.466	558.841
K	615.726	4265.93	416.44	1891.3	2105.7	1853.93	330.822	330.506	329.081	247.535	247.1
Mn	1839.39	1787.48	1553.76	3994.56	1752.83	1721.45	1635.46	2003.84	1642.2	1716.29	1851.56
Ca	70590.9	74844.6	83631.5	79359.5	86403.8	78026.5	86889.3	86024.3	87281.5	85691.6	86178.9
Nb/U	34.3284	102.692	27.75	3.01676	12.6961	14.0633	31.7848	15.7279	32.3529	28.8636	21.6949
La/LuN	0.996023	0.0735657	0.458995	5.00728	1.25315	1.46979	0.649183	0.788553	0.768165	0.816293	0.847268
La/Yb	0.967027	0.0695295	0.425301	4.91751	1.00843	1.53149	0.658861	0.804722	0.783248	0.824346	0.862473
